# Supplementary material for: Injectable supramolecular gelatin hydrogel loading of resveratrol and histatin-1 for burn wound therapy
Source: Royal Society of Chemistry journal article supplement (doi:10.1039/d0bm00391c), 2020-01-01
Supplement: d0bm00391c1.pdf [file d0bm00391c1.pdf]

### Supplementary Data

**Figure S1.** SEM images of Gel-MA hydrogel (A). Rheology of modulus over strain (B). Shear viscosity over shear rate (C); Lap shear stress of HGM and Gel-MA (D); Swelling ratio within 72 h (E); Degradation ratio within 22 h in collagenase solution (F).

**Figure S2.** Tube formation (A) and statistical analyses (B) assay; Scratch wound healing assay (C); Live-dead staining of L929 cells (D); Cell viability of L929 cells after 24h and 48 h (E).

**Figure S3.** Immunohistochemistry (A) at 14 days of IL-6, IL-1 $\beta$ , TNF- $\alpha$  and TGF- $\beta$ 1; Analysis of expression of IL-6, IL-1 $\beta$ , TNF- $\alpha$  and TGF- $\beta$  at 7 days (B) and 14 days (C).

**Figure S4.** Quantitative statistic of WB at 7 days (A) and 14 days (B).

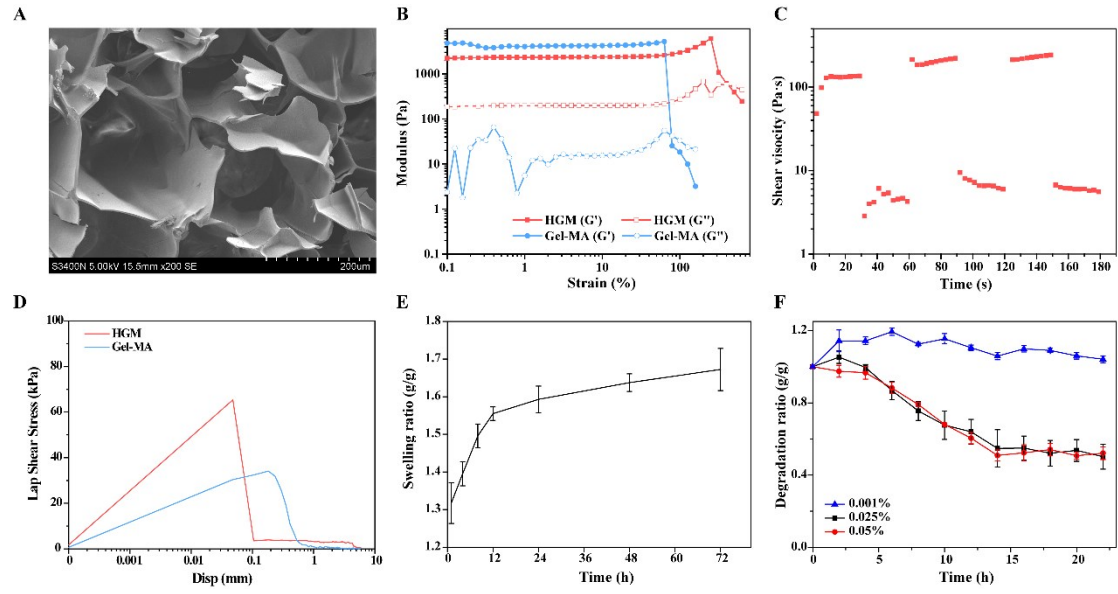

**Figure S1.**

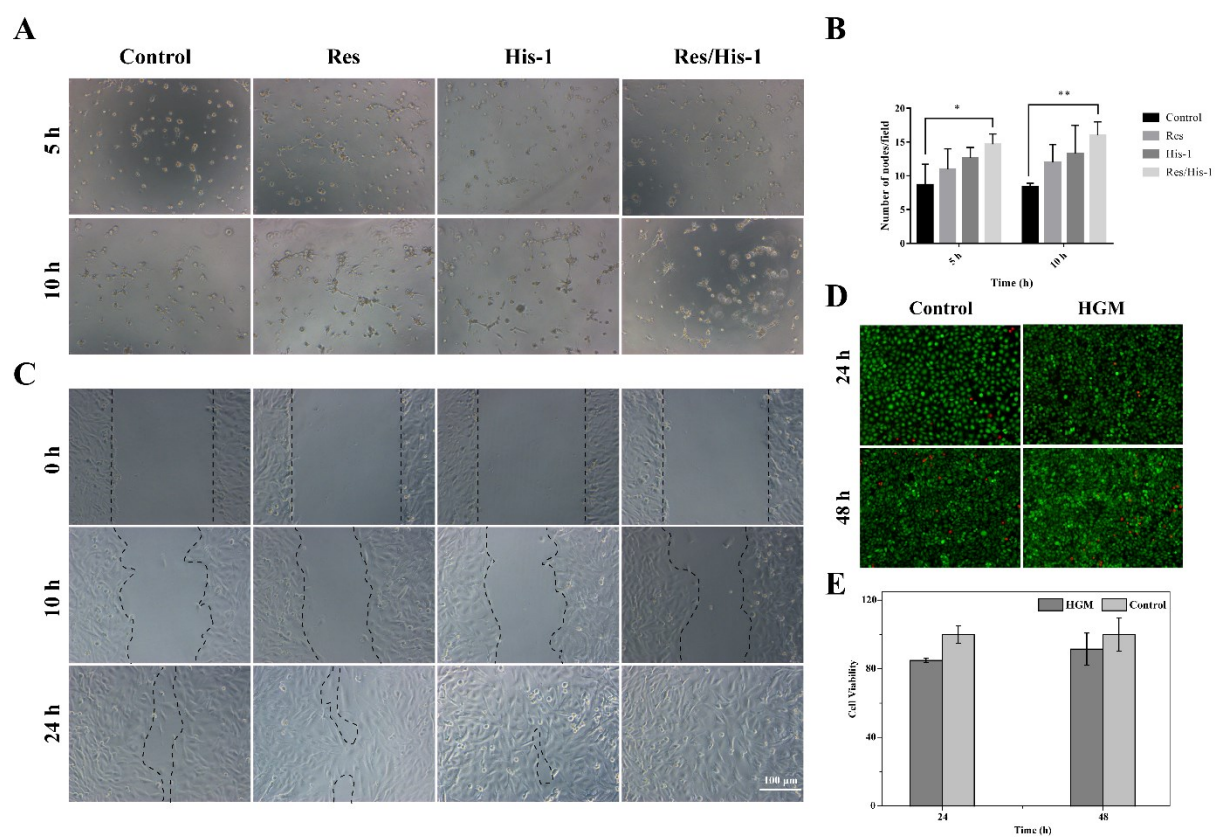

**Figure S2.**

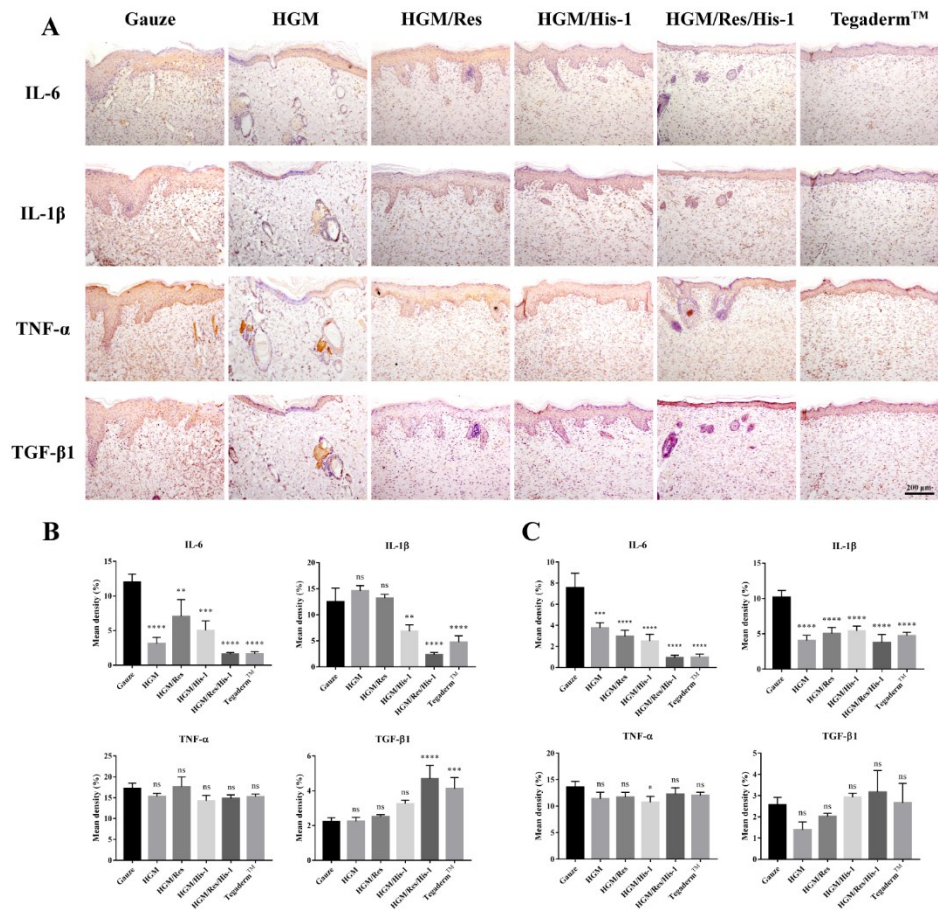

Figure S3.

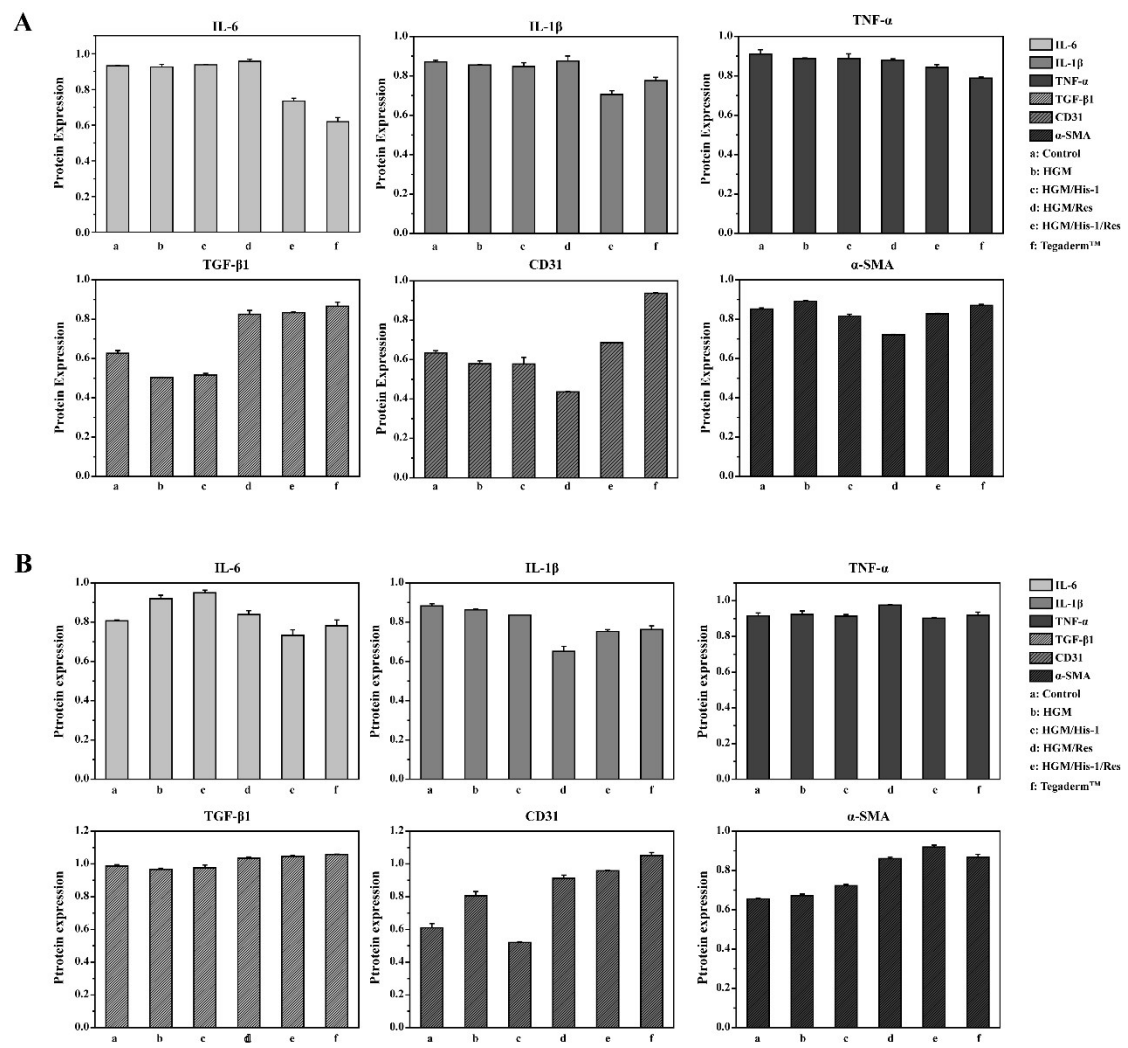

**Figure S4.**
